# Supplementary material for: Expression of Concern: p63 Promotes Cell Survival through Fatty Acid Synthase
Source: PubMed Central journal article supplement (PMC6622553; doi:10.1371/journal.pone.0219869), 2019-07-11

Fig.S1B

b-actin

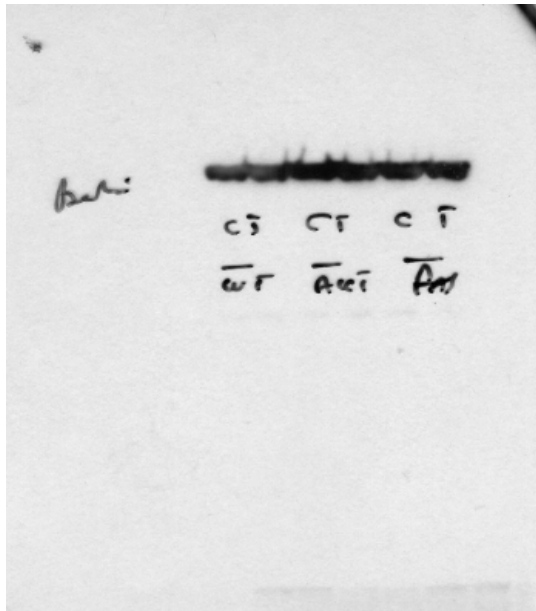

FASN

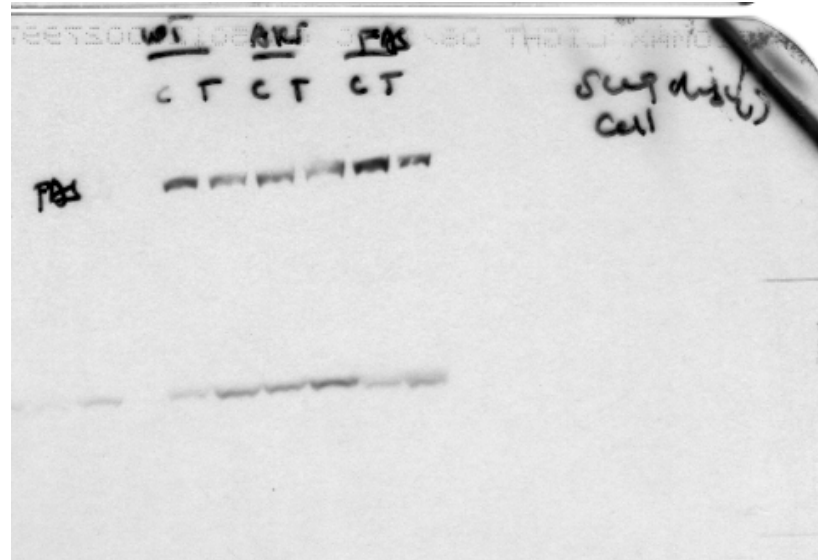

p-Akt

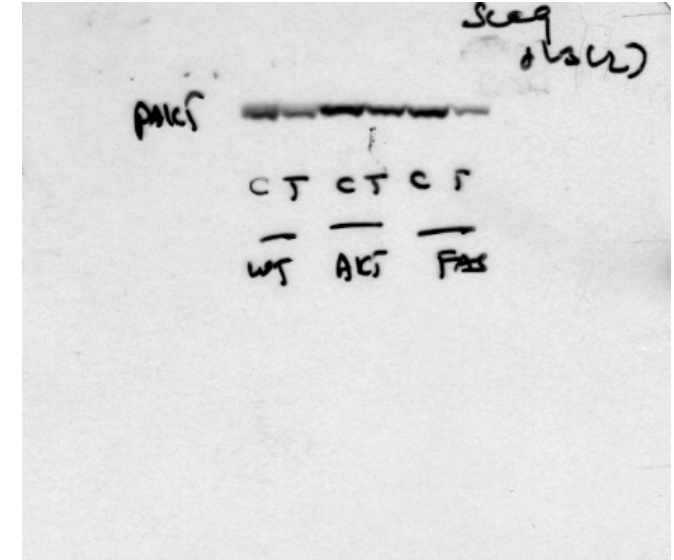

Supplement: pone.0219869.s001.pdf [file pone.0219869.s001.pdf]
