# Supplementary material for: Expression of Concern: p63 Promotes Cell Survival through Fatty Acid Synthase
Source: PubMed Central journal article supplement (PMC6622553; doi:10.1371/journal.pone.0219869), 2019-07-11

p63

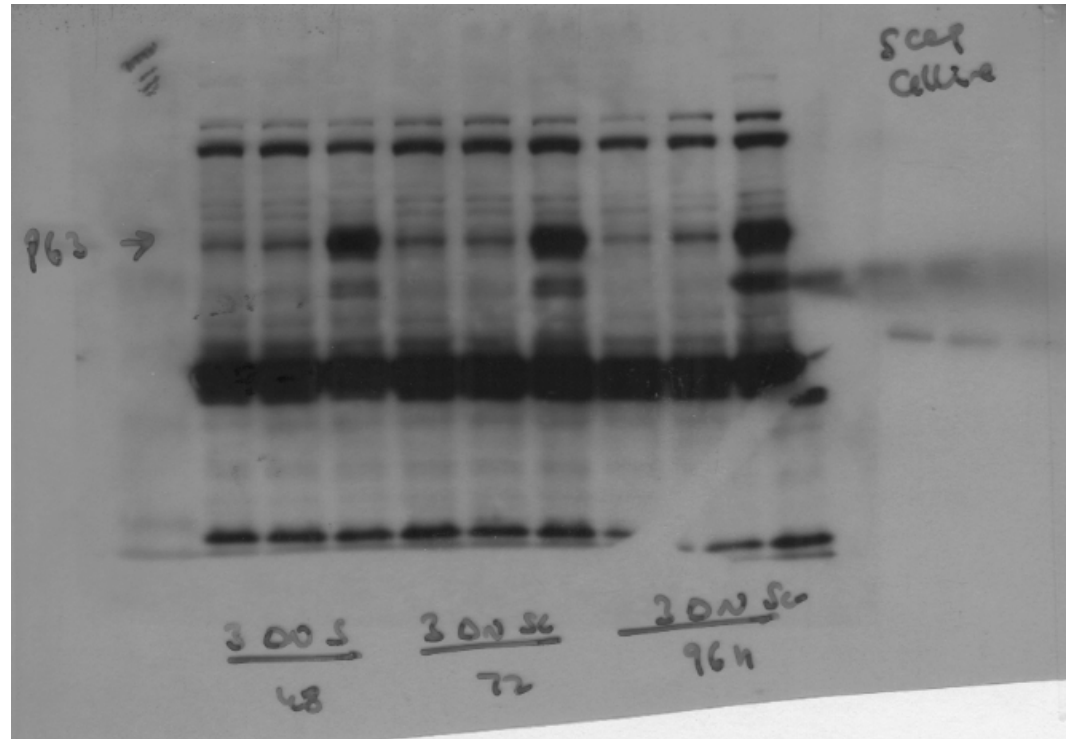

b-actin

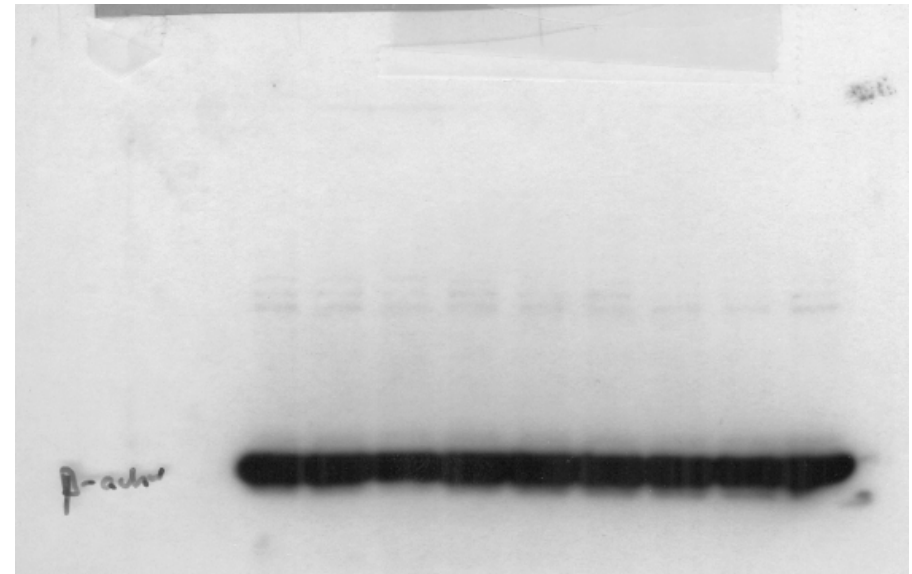

Supplement: pone.0219869.s002.pdf [file pone.0219869.s002.pdf]
